# Supplementary material for: Preparticipation medical evaluation for elite athletes: EFSMA recommendations on standardised preparticipation evaluation form in European countries
Source: HighWire-hosted journal article supplement (doi:10.1136/bmjsem-2021-001178), 2021-10-01
Supplement: bmjsem-2021-001178supp001_data_supplement.pdf [file bmjsem-2021-001178supp001_data_supplement.pdf]

# PRE-PARTICIPATION EVALUATION FORM ELITE ATHLETES

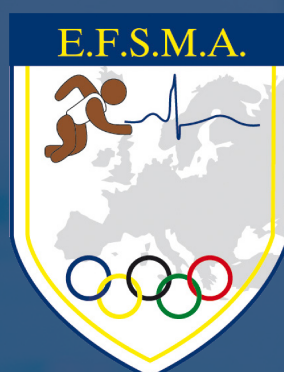

Sports Medicine Centre

Country

Date

Pre-Participation Evaluation Form

**ELITE ATHLETES**

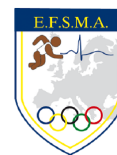

## PRE-PARTICIPATION EVALUATION FORM

Questionnaire to be completed by the athlete before physician's evaluation

|                                    |  |                   |  |
|------------------------------------|--|-------------------|--|
| <b>Surame</b>                      |  | <b>First Name</b> |  |
| <b>Date of Birth</b>               |  | <b>Gender</b>     |  |
| <b>Team/Sports Club</b>            |  |                   |  |
| <b>Sport/Position on the Field</b> |  |                   |  |
| <b>Phone Number</b>                |  | <b>E-mail</b>     |  |

### SECTION 1 - HEALTH STATUS

#### ATHLETE'S HISTORY FORM:

Please answer ALL the following questions below. Give details to ALL "YES" answers

| No. | Family Medical History                                                                                                                                                                                                                                                                                                 | Yes | No |
|-----|------------------------------------------------------------------------------------------------------------------------------------------------------------------------------------------------------------------------------------------------------------------------------------------------------------------------|-----|----|
| 1.  | Has any family member or relative died of heart problems or had an unexpected or unexplained sudden death?                                                                                                                                                                                                             |     |    |
| 2.  | Has any family member or relative had a genetic heart problem such as hypertrophic cardiomyopathy (HCM), Marfan syndrome, arrhythmogenic right ventricular cardiomyopathy (ARVC), long QT syndrome (LQTS), short QT syndrome (SQTS), Brugada syndrome or catecholaminergic polymorphic ventricular tachycardia (CPVT)? |     |    |
| 3.  | Has any family member or relative had a pacemaker or implanted defibrillator before age 35?                                                                                                                                                                                                                            |     |    |
| 4.  | Has any family member or relative had high blood pressure?                                                                                                                                                                                                                                                             |     |    |
| 5.  | Has any family member or relative had unexplained seizures?                                                                                                                                                                                                                                                            |     |    |
| 6.  | Has any family member or relative had diabetes?                                                                                                                                                                                                                                                                        |     |    |

Please explain "YES" answers below:

|  |
|--|
|  |
|  |
|  |
|  |

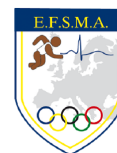

## PRE-PARTICIPATION EVALUATION FORM

### SECTION 1 - HEALTH STATUS ... cont

| No. | Personal Medical History                                                                                                      | Yes | No |
|-----|-------------------------------------------------------------------------------------------------------------------------------|-----|----|
| 1   | Has a doctor ever denied or restricted your participation in sports for any reason?                                           |     |    |
| 2   | Do you have a history of the following?                                                                                       |     |    |
|     | Fainting/dizziness/pass out during or after exercise?                                                                         |     |    |
|     | Respiratory Problems (pneumonia, bronchitis, sinus problems)?                                                                 |     |    |
|     | Chest discomfort during exercise?                                                                                             |     |    |
|     | Asthma or Wheezing? If yes, are you on medication or inhaler? Please specify                                                  |     |    |
|     | Attention Deficit Disorder or Attention Deficit-Deficit Hyperactivity?                                                        |     |    |
|     | Heart disease?                                                                                                                |     |    |
|     | Chronic Skin Disease (e.g. eczema, psoriasis)?                                                                                |     |    |
|     | Hepatitis/Yellow Jaundice/Kidney/Bladder Disease? Abdominal Issues, Digestive Tract Disease (ulcer, colitis, etc.) or Hernia? |     |    |
|     | Frequent or Severe Headache (migraine)?                                                                                       |     |    |
|     | High Blood Pressure/Cholesterol?                                                                                              |     |    |
|     | Depression or Anxiety?                                                                                                        |     |    |
|     | Speech, Hearing, or Vision Problems?                                                                                          |     |    |
|     | Sexually Transmitted Disease or HIV?                                                                                          |     |    |
|     | Cancer (skin, thyroid, etc.)?                                                                                                 |     |    |
|     | Thrombophlebitis or Blood Clots?                                                                                              |     |    |
|     | Thyroid, Diabetes or other Endocrine Disorder?                                                                                |     |    |
|     | Other medical illnesses?                                                                                                      |     |    |
| 3   | Have you ever been knocked unconscious?                                                                                       |     |    |
| 4   | Have you ever had a head injury of any kind?                                                                                  |     |    |
| 5   | Have you ever had a seizure, convulsions or epilepsy?                                                                         |     |    |



## PRE-PARTICIPATION EVALUATION FORM

### SECTION 1 - HEALTH STATUS ... cont

| No. | Personal Medical History ... cont                                                                                                                                                                                                    | Yes         | No                      |
|-----|--------------------------------------------------------------------------------------------------------------------------------------------------------------------------------------------------------------------------------------|-------------|-------------------------|
| 6   | Do you have an allergy to any of the following?                                                                                                                                                                                      |             |                         |
|     | Drug or medicine (over the counter/prescribed)                                                                                                                                                                                       |             |                         |
|     | Foods                                                                                                                                                                                                                                |             |                         |
|     | Insect or animals                                                                                                                                                                                                                    |             |                         |
|     | Plants, grasses, pollen, dust, other. Please specify                                                                                                                                                                                 |             |                         |
| 7   | Are you on any medication or regular treatment? (Including birth control pills, insulin, allergy shots or pills, asthma inhalers, epilepsy medication, anti-inflammatory medication, supplements of any kind. etc.) - Please Specify |             |                         |
|     | <b>Medication</b>                                                                                                                                                                                                                    | <b>Dose</b> | <b>Frequency of use</b> |
|     | 1.                                                                                                                                                                                                                                   |             |                         |
|     | 2.                                                                                                                                                                                                                                   |             |                         |
|     | 3.                                                                                                                                                                                                                                   |             |                         |
|     | 4.                                                                                                                                                                                                                                   |             |                         |
|     | 5.                                                                                                                                                                                                                                   |             |                         |
| 9   | Have you ever had disordered eating?                                                                                                                                                                                                 |             |                         |
| 10  | How many hours do you sleep per night?                                                                                                                                                                                               |             |                         |
| 11  | Do you consume nutritional supplements?                                                                                                                                                                                              |             |                         |
| 12  | Have you ever passed out or nearly passed out during exercise?                                                                                                                                                                       |             |                         |
| 13  | Have you ever had discomfort, pain, tightness or pressure in your chest during exercise?                                                                                                                                             |             |                         |
| 14  | Does your heart ever race, flutter in your chest or skip beats during exercise?                                                                                                                                                      |             |                         |
| 15  | Do you get light-headed or feel shorter of breath than your friends during exercise?                                                                                                                                                 |             |                         |
| 16  | Have you ever had a stress fracture or an injury to a bone, muscle, ligament, joint or tendon?                                                                                                                                       |             |                         |
| 17  | Do you wear contact lenses during practice or competition?                                                                                                                                                                           |             |                         |
| 18  | Do you drink alcohol? If so, how often and how much?                                                                                                                                                                                 |             |                         |
| 19  | Do you smoke? If so, how often and how much?                                                                                                                                                                                         |             |                         |
| 20  | Do you have any ongoing medical issues or recent illness?                                                                                                                                                                            |             |                         |
| 21  | Have you ever required surgery for any medical illness or injury?                                                                                                                                                                    |             |                         |



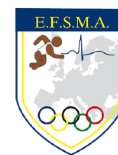

## PRE-PARTICIPATION EVALUATION FORM

### SECTION 1 - HEALTH STATUS ... cont

| No. | Personal Medical History ... cont                                                         | Yes | No |
|-----|-------------------------------------------------------------------------------------------|-----|----|
|     | <b>FEMALE ONLY</b>                                                                        |     |    |
| 22  | Have you ever had a menstrual period?                                                     |     |    |
| 23  | How old were you when you had your first menstrual period?                                |     |    |
| 24  | When was the most recent menstrual period?                                                |     |    |
| 25  | How long does a period last? (on average)                                                 |     |    |
|     | In the past 12 months:                                                                    |     |    |
| 26  | Have you had trouble with heavy menstrual bleeding?                                       |     |    |
| 27  | Have you had bleeding between periods?                                                    |     |    |
| 28  | Have you had menstrual cramps or pain which affected your school or athletic performance? |     |    |
| 29  | Have you had any discharge from your vagina?                                              |     |    |
| 30  | Are you taking birth control pills?                                                       |     |    |
| 31  | Have you ever been pregnant?                                                              |     |    |
|     | <b>MALE ONLY</b>                                                                          |     |    |
| 32  | Were you born with two normal testicles?                                                  |     |    |
| 33  | Have you ever had surgery to remove or repair a testicle?                                 |     |    |

Please explain "YES" answers below:

|  |
|--|
|  |
|  |
|  |
|  |

Do you have any other conditions, illnesses, etc. that should be reported?

|  |
|--|
|  |
|  |
|  |
|  |



## PRE-PARTICIPATION EVALUATION FORM

### SECTION 2 - TRAINING HISTORY

| Sports training history                   |     |                                            |      |
|-------------------------------------------|-----|--------------------------------------------|------|
| Years in sports                           |     | Last training                              |      |
| Best performance                          |     | Next goals                                 |      |
| Training Information                      |     |                                            |      |
| Frequency per week                        |     | Volume/duration of training per week/hours |      |
| Athletic peak performance                 |     | Altitude training (duration, location)     |      |
| Diagnosis of overreaching or overtraining |     |                                            |      |
| Daily recovery                            |     |                                            |      |
| Personal motivation for training          | Low | Medium                                     | High |
|                                           |     |                                            |      |
| Other Detail                              |     |                                            |      |
|                                           |     |                                            |      |

By signing this form, I acknowledge that I have answered all the questions truthfully and have given details to the best of my knowledge.

|                      |  |
|----------------------|--|
| NAME OF ATHLETE      |  |
| SIGNATURE OF ATHLETE |  |

If under 18 years old:

|                                      |  |
|--------------------------------------|--|
| SIGNATURE OF PARENT / LEGAL GUARDIAN |  |
|--------------------------------------|--|



## PRE-PARTICIPATION EVALUATION FORM

### SECTION 3 HEALTH CONDITION

#### MEDICAL COMPLAINTS: Symptoms and signs, aches or pains

|  |
|--|
|  |
|--|

#### The Physical Assessment

|                                                                                                                         |                                                                                                                                  | Normal | Abnormal |
|-------------------------------------------------------------------------------------------------------------------------|----------------------------------------------------------------------------------------------------------------------------------|--------|----------|
| <b>Dermatological condition</b><br>Skin and membranes                                                                   |                                                                                                                                  |        |          |
| <b>Lymph nodes</b><br>thyroid gland                                                                                     |                                                                                                                                  |        |          |
| <b>Musculoskeletal system</b>                                                                                           | Symmetry in joint range of movement, flexibility, strength test of the major muscle groups and balance test                      |        |          |
| <b>Respiratory system</b><br>(percussion, breath sounds, murmurs)                                                       |                                                                                                                                  |        |          |
| <b>Cardiovascular system</b>                                                                                            | HR (after 5min rest): ____/____/min<br>Blood pressure in supine position:<br>Right arm ____/____ mmHg<br>Left arm ____/____ mmHg |        |          |
| <b>Heart examination</b><br>(auscultation standing, palpation, valsalva M., delay in femoral pulses)                    |                                                                                                                                  |        |          |
| <b>12-lead resting ECG</b><br>(digital recording, software supported)                                                   |                                                                                                                                  |        |          |
| <b>Abdominal examination</b>                                                                                            | Inspection<br>Palpation<br>Percussion<br>Auscultation<br>Gastrointestinal symptoms during exercise                               |        |          |
|                                                                                                                         | <div>Yes</div> <div>No</div>                                                                                                     |        |          |
| <b>Neurological evaluation</b>                                                                                          |                                                                                                                                  |        |          |
| <b>Surface EMG (optional)</b>                                                                                           |                                                                                                                                  |        |          |
| <b>Ophthalmological Examination</b><br>(Eyelids, lens, visual acuity, colour blind test, conjunctiva, anterior chamber) | Right eye<br><br>Left Eye                                                                                                        |        |          |

Pre-Participation Evaluation Form

**ELITE ATHLETES**

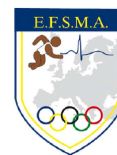

## PRE-PARTICIPATION EVALUATION FORM

## SECTION 3 HEALTH CONDITION ... cont

## The Physical Assessment ... cont

## Fill in if you have lens prescription

|                 |                     |  |  |  |  |                                                           |
|-----------------|---------------------|--|--|--|--|-----------------------------------------------------------|
| Right           |                     |  |  |  |  | BIFOCAL<br>TRIFOCAL<br>SUN GLASSES<br>TINT<br>CASE HARDEN |
| Left            |                     |  |  |  |  |                                                           |
| Reading         |                     |  |  |  |  |                                                           |
| Addition        |                     |  |  |  |  |                                                           |
| ENT examination | Nose                |  |  |  |  |                                                           |
|                 | Throat              |  |  |  |  |                                                           |
|                 | Ears                |  |  |  |  |                                                           |
|                 | Hearing examination |  |  |  |  |                                                           |

## Psychological Assessment

|  |
|--|
|  |
|  |
|  |
|  |
|  |

## Laboratory Tests

|               |  |  |  |
|---------------|--|--|--|
| Blood samples |  |  |  |
| Urine samples |  |  |  |

## Anthropometry

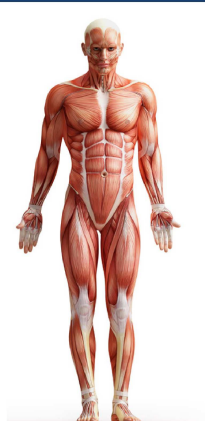

|               |  |
|---------------|--|
| Spine         |  |
| Sagittal plan |  |
| Front plan    |  |
| Upper limbs   |  |
| Lower limbs   |  |

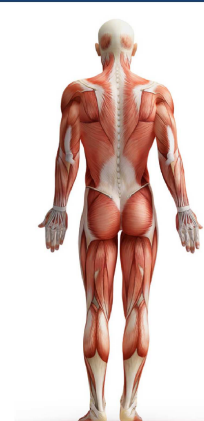



## PRE-PARTICIPATION EVALUATION FORM

### SECTION 3 HEALTH CONDITION ... cont

| Biometrics                                                                                                                                                                                                                                                                                                                                                                                                                                  |  |                                |  |                               |  |                                |  |
|---------------------------------------------------------------------------------------------------------------------------------------------------------------------------------------------------------------------------------------------------------------------------------------------------------------------------------------------------------------------------------------------------------------------------------------------|--|--------------------------------|--|-------------------------------|--|--------------------------------|--|
| Height (cm)                                                                                                                                                                                                                                                                                                                                                                                                                                 |  | Weight (kg)                    |  | The height standing (cm)      |  | Wingspan (cm)                  |  |
| Biacromial diameter                                                                                                                                                                                                                                                                                                                                                                                                                         |  | Bitrochanteric diameter        |  | Anterior thoracic - diameter  |  | Transverse thoracic - diameter |  |
| <b>Evaluations:</b>                                                                                                                                                                                                                                                                                                                                                                                                                         |  |                                |  |                               |  |                                |  |
| Chest perimeter on rests                                                                                                                                                                                                                                                                                                                                                                                                                    |  | Chest perimeter in inspiration |  | Chest perimeter in expiration |  |                                |  |
| <b>Chest elasticity:</b>                                                                                                                                                                                                                                                                                                                                                                                                                    |  |                                |  |                               |  |                                |  |
| <b>Evaluations / thoracic elasticity:</b>                                                                                                                                                                                                                                                                                                                                                                                                   |  |                                |  |                               |  |                                |  |
| <b>Joints perimeters</b><br>Wrist joint                                                                                                                                                                                                                                                                                                                                                                                                     |  |                                |  | Knee joint                    |  | Ankle joint                    |  |
| <b>Mobility</b>                                                                                                                                                                                                                                                                                                                                                                                                                             |  |                                |  |                               |  |                                |  |
| <b>Body composition analysis</b> (Air Displacement Plethismography or whole-body densitometry)                                                                                                                                                                                                                                                                                                                                              |  |                                |  |                               |  |                                |  |
|                                                                                                                                                                                                                                                                                                                                                                                                                                             |  |                                |  |                               |  |                                |  |
| <b>Diagnosis</b> (Anthropometry and Nutritional Status )                                                                                                                                                                                                                                                                                                                                                                                    |  |                                |  |                               |  |                                |  |
|                                                                                                                                                                                                                                                                                                                                                                                                                                             |  |                                |  |                               |  |                                |  |
| Functional and Exercise Capacity                                                                                                                                                                                                                                                                                                                                                                                                            |  |                                |  |                               |  |                                |  |
| <b>1. CARDIO-PULMONARY EXERCISE TESTING CPET-</b><br><b>Digital recording, detailed documentation on a separate sheet, incl. parameters:</b><br>Vo2max, HR max, Heart Rate Reserve (HRR) BP max, Oxygen pulse (O2 Pulse), Oxygen saturation (SpO2 ), Breathing reserve (VE/MVV), Ventilator equivalents for oxygen (VE/VO2) and carbon dioxide (VE/VCO2), End-tidal CO2 partial pressure (PETCO2), Ventilators thresholds - (VT1, VT2), RMR |  |                                |  |                               |  |                                |  |
| <b>2. Lactate analysis</b>                                                                                                                                                                                                                                                                                                                                                                                                                  |  |                                |  |                               |  |                                |  |
| <b>3. ANAEROBIC Exercise Capacity Assessment (optional one of):</b><br>- Wingate test<br>- Total work performed 45 s<br>- Ortojump                                                                                                                                                                                                                                                                                                          |  |                                |  |                               |  |                                |  |



## PRE-PARTICIPATION EVALUATION FORM

### SECTION 3 HEALTH CONDITION ... cont

| Diagnosis Exercise Capacity      |  |
|----------------------------------|--|
| Medical - Sports Recommendations |  |
| Nutrition                        |  |
|                                  |  |
| Ergogenic Aids                   |  |
|                                  |  |
| Recovery                         |  |
|                                  |  |
| Other                            |  |
|                                  |  |

### SECTION 4 - CONCLUSIONS

| Medical Eligibility form                                                   | Yes | No |
|----------------------------------------------------------------------------|-----|----|
| Medically eligible for all sports without restriction                      |     |    |
| Medically eligible with recommendation for further treatment or evaluation |     |    |
| Not medically eligible for sport performance                               |     |    |

| Name of the Examining Physician |  |
|---------------------------------|--|
| Address:                        |  |
| Phone no:                       |  |
| Email:                          |  |
| Signature:                      |  |
